# Supplementary material
Source: PubMed Central journal article supplement (PMC9093125)
Supplement: jvi.00349-22-s0001.pdf [file jvi.00349-22-s0001.pdf]

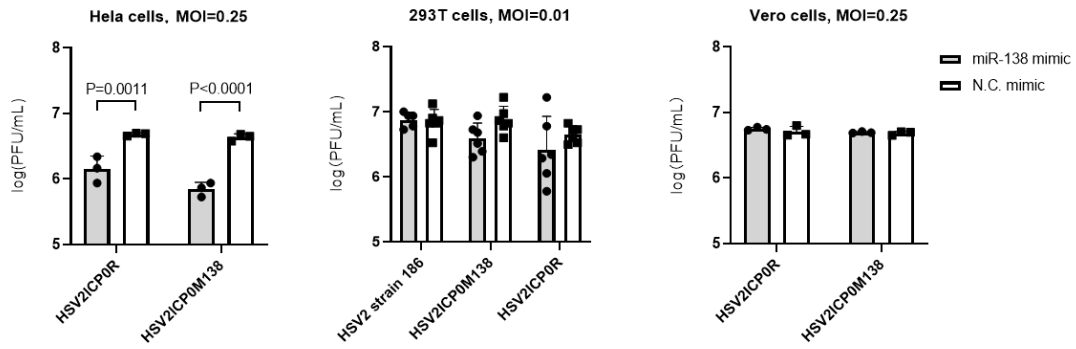

1

2 Fig. S1. Effects of miR-138 on HSV-2 replication in different cells. HeLa (left), 293T  
 3 (middle) and Vero (right) cells were transfected with 10 nM of the indicated mimic for  
 4 24 h, then infected with the indicated virus for 24 h at the indicated MOI before viral  
 5 titer measurements. Data are presented as mean values  $\pm$  S.D. Data were analyzed by  
 6 two-way ANOVA with Sidak's multiple comparisons tests.

7

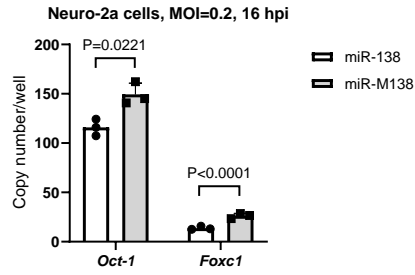

8

9 Fig. S2. Reduction of *Foxc1* and *Oct-1* mRNA levels by transfected miR-138. Neuro-

10 2a cells were transfected with 80 nM of the indicated miRNA mimic for 24 h, then

11 infected with HSV2 strain 186 virus for 16 h (MOI = 1) before qRT-PCR analysis of

12 *Oct-1* (left) and *Foxc1*(right) mRNA levels

13

14 Table S1. Sequences of primers used for cloning.

15

| primer names  | Sequence                                                                      |
|---------------|-------------------------------------------------------------------------------|
| V2ICP0Ecof    | TGTAGAATTCTCGCTCCCCGCGTAATTACTCCCTC                                           |
| V2ICP0Hindr1  | CCAGAAGCTTGGGGAGCTGCATCAAAGGCCAACAA                                           |
| V2ICP0Pstf    | TCTGTCTCCCTCTGCAGTGGACTA                                                      |
| V2ICP0Hindr2  | CCAGAAGCTTATTTTCGCGGATCCGGCGTGTTTC                                            |
| V2-0M138Af    | GAACAGCAACACACAGCTGAATTTTGTTATGGAC                                            |
| V2-0M138Ar    | GTCCATAACAAAATTCAGCTGTGTGTTGCTGTTC                                            |
| V2-0M138Bf    | TGCCCCCGAGGCGCCTCGTCAGCTGGTCCGGGGGGGG<br>GCGG                                 |
| V2-0M138Br    | CCGCCCCCCCCCGGACCAGCTGACGAGGCGCCTCGGG<br>GGCA                                 |
| pUL19-F       | ATGGCCGCTCCTGCCCGCGACCCCCGGGTACCGGTA<br>CGCCGCGGCCATGGTGCCACCGGCTCCATC        |
| pUL19-R       | TTTATTGGGACCTGCCCTCGGAATCGCGGCTCCCAGTC<br>CAA                                 |
| pUL20-F       | CGGAATTCATGACAATGCGGGATGATGTTTCCTTT<br>GGGGTACCTTTTATTGGGACCTGCCCTCGGAATCGCGG |
| pUL20-R       | CTCCCAGTCCAA                                                                  |
| psiV1ICP0UTRf | GACTCTCGAGGGACGCCCCGTGTTTGTGGGGA                                              |
| psiV1ICP0UTRr | CGTAGCGGCCGCTAGGGCCAACACAAAAGACCC                                             |

|               |                                                                            |
|---------------|----------------------------------------------------------------------------|
| psiV2ICP0UTRf | ATCGCTCGAGGGGGAGCTAACACTCGGCTT                                             |
| psiV2ICP0UTRr | GCCAGCGGCCGCCCTCAAGTTTTCAACAAGGCCAGA                                       |
| Q5-MAB-F      | TGAGAGGCGCCTCGGGGGCAG                                                      |
| Q5-MAB-R      | GCTGGCTTCCCTTCGGGCAGCAAGC                                                  |
| Q5-MB-4GtoA-F | GACCACCAGCCGAGGCGCCTCGGGGGCAG                                              |
| Q5-MB-4GtoA-R | CGGGGGGGGGCGGCTTCCCTTCGGGCAGCAAGC                                          |
| Q5-MB-4GtoU-F | GACCACCTGCCGAGGCGCCTCGGGGGCAG                                              |
| Q5-MB-4GtoU-R | CGGGGGGGGGCGGCTTCCCTTCGGGCAGCAAGC                                          |
| Q5-MA-1AtoG-F | ACACACCAGCGTTTTGTTATGGACTTTCTGGCCTTGTT<br>GAAAACCTTGAGGG                   |
| Q5-MA-1AtoG-R | GTTGCTGTTCGGGGCCGTGTCCGTCCCCC                                              |
| Q5-9AtoC-F    | GACCAGCTGACGAGGCGCCTCGGGGGCAG                                              |
| Q5-9AtoC-R    | CGGGGGGGGGCGGCTTCCCTTCGGGCAGCAAGC<br>GCGAATTCGCCACCATGGACTACAAAGACGATGACGA |
| LVFoxc1fw     | TAAAGGGGGCGGTGGAGGTTCTAGAATGCAGGCGCGC<br>TACTCCG                           |
| LVFoxc1rv     | GCGGATCCTCAAACTTGCTACAGTCGTAGACGAAAG                                       |
| LacZfwAfl     | TGATCAGCTAGCTTAAGTAACGCC                                                   |
| lacZrvSma     | ATCGATGAATTCGAGCTCGCC                                                      |

---

17 Table S2. Sequences of primers for qPCR

18

---

| qPCR primer or probe name | Sequence                      |
|---------------------------|-------------------------------|
| qpcr-V2-ICP0-F            | GTGCATGAAGACCTGGATTCC         |
| qpcr-V2-ICP0-R            | GGTCACGCCCACTATCAGGTA         |
| qPCR-V2-LAT-F             | GTCAACACGGACACACTCTTTTT       |
| qPCR-V2-LAT-R             | CGAGGCCTGTTGGTCTTTATC         |
| miR-138-F                 | AGCGCGAGCTGGTGTGT             |
| miR-138-Probe             | (FAM)-TACGACCGGCCTGATTC-(MGB) |
| miR-138-R                 | CCAGTGCAGGGTCCGAGGTA          |
| qLV-mcherry-F             | GGCACCAACTTCCCCTCC            |
| qLV-mcherry-R             | TCTGCTTGATCTCGCCCTTC          |

---

19

20 Table S3. Sequences of primers used for sequencing the ICP0 gene of strain 186.

21

| ICP0 seq<br>primer | Sequence                   |
|--------------------|----------------------------|
| ICP0-seqF1         | CATTCGCACCCCGGCACT         |
| ICP0-seqF2         | TTCAGCACCATCCCGATAGTGAACGA |
| ICP0-seqR1         | TCCGCTGGTTGCCCGTC          |
| ICP0-seqF3         | AGGCTCAGACCGACACCCAAGCA    |
| ICP0-seqR2         | GGAGGACGAGGCCGCAGG         |
| ICP0-seqR3         | TCATCCAGAGGCTGTTCC         |
| ICP0-seqR4         | CTCCTCCTCCTCCCTTCC         |

22

23

24 Table S4. List of sequences from clinical isolates used for sequence alignment

25

---

HSV-2 sequences

---

|            |            |            |            |            |            |            |            |
|------------|------------|------------|------------|------------|------------|------------|------------|
| D10471.1   | KX574890.2 | MF510283.1 | MF510325.1 | MF510366.1 | MH790575.1 | MH790616.1 | MH790658.1 |
| JN561323.2 | KX574891.2 | MF510284.1 | MF510326.1 | MF510367.1 | MH790576.1 | MH790617.1 | MH790659.1 |
| KF781518.1 | KX574892.2 | MF510285.1 | MF510327.1 | MF510368.1 | MH790577.1 | MH790618.1 | MH790660.1 |
| KP192856.1 | KX574893.2 | MF510286.1 | MF510328.1 | MF510369.1 | MH790578.1 | MH790619.1 | MH790662.1 |
| KP334093.1 | KX574894.2 | MF510287.1 | MF510329.1 | MF510370.1 | MH790579.1 | MH790620.1 | MH790663.1 |
| KP334094.1 | KX574895.2 | MF510288.1 | MF510330.1 | MF510371.1 | MH790580.1 | MH790621.1 | MH790664.1 |
| KP334095.1 | KX574896.2 | MF510289.1 | MF510331.1 | MF564034.1 | MH790581.1 | MH790622.1 | MH790665.1 |
| KP334096.1 | KX574897.2 | MF510291.1 | MF510332.1 | MF564035.1 | MH790582.1 | MH790623.1 | MH790666.1 |
| KP334097.1 | KX574898.2 | MF510292.1 | MF510333.1 | MF564036.1 | MH790584.1 | MH790624.1 | MH790667.1 |
| KX574860.2 | KX574899.2 | MF510293.1 | MF510334.1 | MF564037.1 | MH790585.1 | MH790625.1 | MH790668.1 |
| KX574861.2 | KX574901.2 | MF510294.1 | MF510335.1 | MF621254.1 | MH790586.1 | MH790626.1 | MH790669.1 |
| KX574862.2 | KX574902.2 | MF510295.1 | MF510336.1 | MF621255.1 | MH790587.1 | MH790627.1 | MH790670.1 |
| KX574863.2 | KX574903.2 | MF510296.1 | MF510337.1 | MF621256.1 | MH790588.1 | MH790628.1 | MH790671.1 |
| KX574864.2 | KX574904.2 | MF510297.1 | MF510338.1 | MF621257.1 | MH790589.1 | MH790629.1 | MH796783.1 |
| KX574865.2 | KX574905.2 | MF510298.1 | MF510339.1 | MF621258.1 | MH790590.1 | MH790630.1 | MH796784.1 |
| KX574866.2 | KX574906.2 | MF510299.1 | MF510340.1 | MH790550.1 | MH790591.1 | MH790631.1 | MH899846.1 |
| KX574867.2 | KY922720.1 | MF510300.1 | MF510341.1 | MH790551.1 | MH790592.1 | MH790632.1 | MK105995.1 |
| KX574868.2 | KY922721.1 | MF510301.1 | MF510342.1 | MH790552.1 | MH790593.1 | MH790633.1 | MK105996.1 |
| KX574869.2 | KY922722.1 | MF510302.1 | MF510343.1 | MH790553.1 | MH790595.1 | MH790636.1 | MK105997.1 |

|            |            |               |            |            |            |            |            |
|------------|------------|---------------|------------|------------|------------|------------|------------|
| KX574870.2 | KY922723.1 | MF510303.1    | MF510345.1 | MH790554.1 | MH790596.1 | MH790637.1 | MK105998.1 |
| KX574871.2 | KY922726.1 | MF510307.1    | MF510346.1 | MH790555.1 | MH790597.1 | MH790638.1 | MK105999.1 |
| KX574872.2 | LS480640.1 | MF510308.1    | MF510347.1 | MH790556.1 | MH790598.1 | MH790639.1 | MK106000.1 |
| KX574873.2 | M69065.1   | MF510309.1    | MF510348.1 | MH790557.1 | MH790599.1 | MH790640.1 | MK106001.1 |
| KX574874.2 | MF510267.1 | MF510310.1    | MF510349.1 | MH790558.1 | MH790600.1 | MH790641.1 | MK106002.1 |
| KX574875.2 | MF510268.1 | MF510311.1    | MF510350.1 | MH790559.1 | MH790601.1 | MH790642.1 | MK106003.1 |
| KX574876.2 | MF510269.1 | MF510312.1    | MF510351.1 | MH790560.1 | MH790602.1 | MH790644.1 | MK106004.1 |
| KX574877.2 | MF510270.1 | MF510313.1    | MF510352.1 | MH790561.1 | MH790603.1 | MH790645.1 | Z86099.2   |
| KX574878.2 | MF510271.1 | MF510314.1    | MF510353.1 | MH790562.1 | MH790604.1 | MH790646.1 |            |
| KX574879.2 | MF510272.1 | MF510315.1    | MF510354.1 | MH790563.1 | MH790605.1 | MH790647.1 |            |
| KX574880.2 | MF510273.1 | MF510316.1    | MF510356.1 | MH790564.1 | MH790606.1 | MH790648.1 |            |
| KX574881.2 | MF510274.1 | MF510317.1    | MF510357.1 | MH790565.1 | MH790607.1 | MH790649.1 |            |
| KX574882.2 | MF510275.1 | MF510318.1    | MF510358.1 | MH790566.1 | MH790608.1 | MH790650.1 |            |
| KX574883.2 | MF510276.1 | MF510319.1    | MF510359.1 | MH790567.1 | MH790609.1 | MH790651.1 |            |
| KX574884.2 | MF510277.1 | MF510320.1    | MF510360.1 | MH790568.1 | MH790610.1 | MH790652.1 |            |
| KX574885.2 | MF510278.1 | MF510320.1(2) | MF510361.1 | MH790569.1 | MH790611.1 | MH790653.1 |            |
| KX574886.2 | MF510279.1 | MF510321.1    | MF510362.1 | MH790570.1 | MH790612.1 | MH790654.1 |            |
| KX574887.2 | MF510280.1 | MF510322.1    | MF510363.1 | MH790571.1 | MH790613.1 | MH790655.1 |            |
| KX574888.2 | MF510281.1 | MF510323.1    | MF510364.1 | MH790572.1 | MH790614.1 | MH790656.1 |            |
| KX574889.2 | MF510282.1 | MF510324.1    | MF510365.1 | MH790573.1 | MH790615.1 | MH790657.1 |            |

---



---

## HSV-1 sequences

---

|            |            |            |            |            |            |            |            |
|------------|------------|------------|------------|------------|------------|------------|------------|
| AB618031.1 | KF498959.1 | KR011304.1 | KX265037.1 | MG708285.1 | MG999870.1 | MH160366.1 | MH813992.1 |
| DQ889502.1 | KJ847330.1 | KR011305.1 | KX265038.1 | MG708286.1 | MG999871.1 | MH160367.1 | MH813993.1 |
| FJ593289.1 | KM222721.1 | KR011306.1 | KX265039.1 | MG708287.1 | MG999872.1 | MH160368.1 | MH813994.1 |
| GU734771.1 | KM222722.1 | KR011307.1 | KX265040.1 | MG708288.1 | MG999873.1 | MH160369.1 | MH925774.1 |
| GU734772.1 | KM222723.1 | KR011308.1 | KX265041.1 | MG708289.1 | MG999874.1 | MH160370.1 | MH999838.1 |
| HM585496.2 | KM222724.1 | KR011309.1 | KX265042.1 | MG708290.1 | MG999875.1 | MH160371.1 | MH999839.1 |
| HM585497.2 | KM222725.1 | KR011310.1 | KX265043.1 | MG708291.1 | MG999876.1 | MH160372.1 | MH999840.1 |
| HM585498.2 | KM222726.1 | KR011311.1 | KX265044.1 | MG708292.1 | MG999877.1 | MH160373.1 | MH999841.1 |
| HM585499.2 | KM222727.1 | KR011312.1 | KX265045.1 | MG999838.1 | MG999878.1 | MH160374.1 | MH999842.1 |
| HM585500.2 | KR011274.1 | KR052507.1 | KX265046.1 | MG999839.1 | MG999879.1 | MH160375.1 | MH999843.1 |
| HM585501.2 | KR011275.1 | KR052508.1 | KX424525.1 | MG999840.1 | MG999880.1 | MH160376.1 | MH999844.1 |
| HM585502.2 | KR011276.1 | KT425107.1 | KX791878.1 | MG999841.1 | MG999881.1 | MH160377.1 | MH999845.1 |
| HM585503.2 | KR011277.1 | KT425108.1 | KX791976.1 | MG999842.1 | MG999882.1 | MH160378.1 | MH999846.1 |
| HM585504.2 | KR011278.1 | KT425109.1 | KX792006.1 | MG999843.1 | MG999883.1 | MH160379.1 | MH999847.1 |
| HM585505.2 | KR011279.1 | KT425110.1 | KX946970.1 | MG999845.1 | MG999884.1 | MH160380.1 | MH999848.1 |
| HM585506.2 | KR011280.1 | KT780616.1 | KY922718.1 | MG999846.1 | MG999885.1 | MH160381.1 | MH999849.1 |
| HM585507.2 | KR011281.1 | KT887224.1 | KY922719.1 | MG999847.1 | MG999886.1 | MH160382.1 | MH999849.1 |
| HM585508.2 | KR011282.1 | KT899744.1 | LT576866.1 | MG999848.1 | MG999887.1 | MH160383.1 | MH999850.1 |
| HM585509.2 | KR011283.1 | KU310657.1 | LT576867.1 | MG999849.1 | MG999888.1 | MH160384.1 | MH999851.1 |
| HM585510.2 | KR011284.1 | KU310657.1 | LT576868.1 | MG999850.1 | MG999889.1 | MH160385.1 | MK952183.1 |
| HM585511.2 | KR011285.1 | KU310658.1 | LT576869.1 | MG999851.1 | MG999890.1 | MH160386.1 | MK952184.1 |

---

---

|               |            |            |            |            |            |            |               |
|---------------|------------|------------|------------|------------|------------|------------|---------------|
| HM585512.2    | KR011286.1 | KU310659.1 | LT576870.1 | MG999852.1 | MG999891.1 | MH160387.1 | MK952185.1    |
| HM585513.2    | KR011287.1 | KU310660.1 | LT576871.1 | MG999853.1 | MG999892.1 | MH160388.1 | MN136523.1    |
| HM585514.2    | KR011288.1 | KU310661.1 | LT594105.1 | MG999854.1 | MG999893.1 | MH160389.1 | MN136524.1    |
| HM585515.2    | KR011289.1 | KX265022.1 | LT594106.1 | MG999855.1 | MG999894.1 | MH160390.1 | MN159376.1    |
| J04323.1      | KR011290.1 | KX265023.1 | LT594107.1 | MG999856.1 | MG999895.1 | MH160391.1 | MN159377.1    |
| JN400093.1    | KR011291.1 | KX265024.1 | LT594108.1 | MG999857.1 | MG999896.1 | MH319852.1 | MN159378.1    |
| JN400093.1(2) | KR011292.1 | KX265025.1 | LT594109.1 | MG999858.1 | MG999897.1 | MH480513.1 | MN159379.1    |
| JN420337.1    | KR011293.1 | KX265026.1 | LT594110.1 | MG999859.1 | MG999898.1 | MH813981.1 | MN159380.1    |
| JN420338.1    | KR011294.1 | KX265027.1 | LT594111.1 | MG999860.1 | MG999899.1 | MH813982.1 | MN159381.1    |
| JN420339.1    | KR011295.1 | KX265028.1 | LT594112.1 | MG999861.1 | MH102298.1 | MH813983.1 | MN159382.1    |
| JN420340.1    | KR011296.1 | KX265029.1 | LT594192.1 | MG999862.1 | MH160358.1 | MH813984.1 | MN159382.1(2) |
| JN420341.1    | KR011297.1 | KX265030.1 | LT594457.1 | MG999863.1 | MH160359.1 | MH813985.1 | MN159383.1    |
| JN420342.2    | KR011298.1 | KX265031.1 | M17921.1   | MG999864.1 | MH160360.1 | MH813986.1 | X04614.1      |
| JN555585.1    | KR011299.1 | KX265032.1 | M74421.1   | MG999865.1 | MH160361.1 | MH813987.1 | X14112.1      |
| JQ673480.1    | KR011300.1 | KX265033.1 | M90438.1   | MG999866.1 | MH160362.1 | MH813988.1 |               |
| JQ730035.1    | KR011301.1 | KX265034.1 | MF156584.1 | MG999867.1 | MH160363.1 | MH813989.1 |               |
| JQ780693.1    | KR011302.1 | KX265035.1 | MG646679.1 | MG999868.1 | MH160364.1 | MH813990.1 |               |
| JX142173.1    | KR011303.1 | KX265036.1 | MG708284.1 | MG999869.1 | MH160365.1 | MH813991.1 |               |

---
